# Supplementary material for: The Non-Invasive Characterization of Iron Age Glass Finds from the “Gaetano Chierici” Collection in Reggio Emilia (Italy)
Source: MDPI journal article supplement (doi:10.3390/heritage6070294), 2023-07-24
Supplement: s1 [file s1]

# The Non-Invasive Characterization of Iron Age Glass Finds from the “Gaetano Chierici” Collection in Reggio Emilia (Italy)

## SUPPORTING INFORMATION

Contains the following tables:

Table S1: Some details on the Iron Age glass finds of the "Gaetano Chierici" collection at the Civic Museum of Reggio Emilia (Italy).

Table S2: p-XRF data.

**Table S1.** Some details on the Iron Age glass finds of the "Gaetano Chierici" collection at the Civic Museums of Reggio Emilia (Italy). The diameter measurements were taken in the widest place in the direction perpendicular to the aperture (for beads). Fragmented objects diameters were not measured, unless more than half of the bead was present. "Colour" is the colour of the base of the object. Short description of the decorations is given in the last column. "-" – not applicable.

| Group 1. Spherical blue beads |         |               |            |                     |           |                  |               |
|-------------------------------|---------|---------------|------------|---------------------|-----------|------------------|---------------|
| Museum ID                     | Lab. ID | Diameter (mm) | Width (mm) | Aperture diam. (mm) | Colour    | Translucency     | Decoration    |
| S.53/126                      | RE3     | 11.5          | 9.5        | 3.5                 | blue      | semi-translucent | –             |
| S.53/131                      | RE7     | 14.5          | 11         | 3                   | blue      | semi-translucent | –             |
| S.53/129                      | RE8     | 14.5          | 11         | 3                   | blue      | semi-translucent | –             |
| S.27/120                      | RE29    | 15.0          | 10         | 3                   | blue      | Opaque           | white wave    |
| S.38/123                      | RE32    | –             | –          | –                   | blue      | semi-translucent | –             |
| S.38/125                      | RE34    | –             | –          | –                   | blue      | Opaque           | –             |
| S.38/129                      | RE38    | 13.5          | 11         | 3                   | blue      | semi-translucent | white wave    |
| S.38/131                      | RE41    | 16.0          | 11         | 4                   | blue      | semi-translucent | –             |
| S.38/134                      | RE44    | 16.0          | 13         | 3.5                 | blue      | Opaque           | –             |
| S.38/135                      | RE45    | 8.0           | 4.5        | 3                   | blue      | Opaque           | –             |
| Group 2. Pear shaped beads    |         |               |            |                     |           |                  |               |
| Museum ID                     | Lab. ID | Diameter (mm) | Width (mm) | Aperture diam. (mm) | Colour    | Translucency     | Decoration    |
| S.27/214                      | RE30    | 31.0          | –          | –                   | blue      | Opaque           | lines, waves  |
| S.38/143                      | RE48    | 22.0          | 21         | 5                   | blue      | Opaque           | wave          |
| Group 3. Large ring beads     |         |               |            |                     |           |                  |               |
| Museum ID                     | Lab. ID | Diameter (mm) | Width (mm) | Aperture diam. (mm) | Colour    | Translucency     | Decoration    |
| S.53/134                      | RE9     | 25.0          | 9          | 11.5                | dark blue | Opaque           | yellow stripe |
| S.53/138                      | RE10    | 39.0          | 18         | 10.5                | blue      | Translucent      | –             |
| T.89                          | RE16    | 25.0          | 8          | 13                  | dark blue | semi-translucent | –             |
| T.89                          | RE18    | 25.0          | 7.5        | 12                  | dark blue | semi-translucent | –             |
| Group 4. Small ring beads     |         |               |            |                     |           |                  |               |

| Museum ID | Lab. ID | Diameter (mm) | Width (mm) | Aperture diam. (mm) | Colour | Translucency     | Decoration |
|-----------|---------|---------------|------------|---------------------|--------|------------------|------------|
| S.27/230  | RE31    | 6.0           | 3          | 2.5                 | blue   | semi-translucent | –          |
| S.38/126  | RE35    | 8.0           | –          | –                   | blue   | semi-translucent | –          |

### Group 5. Large eye beads

| Museum ID       | Lab. ID | Diameter (mm) | Width (mm) | Aperture diam. (mm) | Colour    | Translucency | Decoration               |
|-----------------|---------|---------------|------------|---------------------|-----------|--------------|--------------------------|
| S.27/36         | RE27    | 28.0          | 20.5       | 8                   | dark blue | Opaque       | spiral eyes              |
| S.38/130        | RE39    | 36.0          | 23         | 7                   | green     | Opaque       | stratified eyes, stripes |
| S.38/130<br>(1) | RE40    | 28.0          | 17         | 8.5                 | dark blue | Opaque       | Spiral eyes              |

### Group 6. Small eye beads

| Museum ID | Lab. ID | Diameter (mm) | Width (mm) | Aperture diam. (mm) | Colour    | Translucency | Decoration           |
|-----------|---------|---------------|------------|---------------------|-----------|--------------|----------------------|
| S.38/124  | RE33    | –             | –          | –                   | yellow    | Opaque       | twin stratified eyes |
| S.38/128  | RE37    | 11.5          | 7          | 6                   | dark blue | Opaque       | stratified eyes      |
| S.38/132  | RE42    | –             |            |                     | dark blue | Opaque       | stratified eyes      |
| S.38/136  | RE46    | 15.0          | 9          | 8                   | yellow    | Opaque       | twin stratified eyes |
| S.38/137  | RE47    | 9.0           | 8          | 3                   | turquoise | Opaque       | Stratified eyes      |

### Group 7. Disc shaped beads

| Museum ID | Lab. ID | Diameter (mm) | Width (mm) | Aperture diam. (mm) | Colour             | Translucency | Decoration  |
|-----------|---------|---------------|------------|---------------------|--------------------|--------------|-------------|
| S.53/127  | RE4     | 15.5          | 5          | 4                   | colourless, yellow | semi clear   | –           |
| S.53/130  | RE5     | 17.5          | 6          | 4                   | colourless, yellow | semi clear   | –           |
| S.53/132  | RE6     | 19.0          | 7          | 4                   | colourless, yellow | semi clear   | –           |
| S.53/140  | RE11    | 25.0          | 7.5        | 7                   | colourless, yellow | Translucent  | pink stripe |

### Group 8. Toroid beads

| Museum ID | Lab. ID | Diameter (mm) | Width (mm) | Aperture diam. (mm) | Colour    | Translucency     | Decoration               |
|-----------|---------|---------------|------------|---------------------|-----------|------------------|--------------------------|
| S.53/136  | RE13    | 36.0          | 14         | 13                  | dark blue | semi-translucent | white and blue stripes   |
| T.89      | RE14    | 38.0          | 16.5       | 12                  | brown     | Opaque           | light coloured stripes   |
| T.89      | RE15    | 32.0          | 11         | 12                  | dark      | Opaque           | yellow and white stripes |
| T.89      | RE17    | 33.5          | 14         | 13.5                | dark      | Opaque           | yellow and white stripes |

### Group 9. Bangles

| Museum ID     | Lab. ID | Diameter (mm) | Width (mm) | Aperture diam. (mm) | Colour    | Translucency     | Decoration                              |
|---------------|---------|---------------|------------|---------------------|-----------|------------------|-----------------------------------------|
| S.44/163      | RE19    | –             | 6.5        | –                   | dark blue | Translucent      | yellow waves                            |
| S.44/164      | RE20    | –             | 9          | –                   | brown     | Translucent      | white stripes                           |
| S.44/166      | RE22    | –             | –          | –                   | dark blue | Translucent      | yellow waves                            |
| S.44/167      | RE23    | –             | –          | –                   | dark blue | Translucent      | yellow waves                            |
| S.44/168      | RE24    | –             | –          | –                   | dark blue | Translucent      | lines                                   |
| S.44/170      | RE26    | –             | 8          | –                   | dark blue | Translucent      | yellow lined and waves                  |
| Other objects |         |               |            |                     |           |                  |                                         |
| Museum ID     | Lab. ID | Diameter (mm) | Width (mm) | Aperture diam. (mm) | Colour    | Translucency     | Decoration                              |
| S.97/24-38    | RE2     | 15.0          | 23         | 5                   | blue      | semi-translucent | ribs                                    |
| S.44/169      | RE25    | –             | –          | –                   | dark blue | Translucent      | –                                       |
| S.27/37       | RE28    | 23.0          | 17         | 4                   | red       | opaque           | grey-green protrusions, lines           |
| S.38/127      | RE36    | 10.5          | 9          | 3                   | dark      | opaque           | –                                       |
| S.38/133      | RE43    | 13.0          | 4          | 5                   | dark      | opaque           | –                                       |
| S.38/170      | RE49    | –             | 3          | –                   | dark blue | opaque           | yellow and blue lines, shevron, stripes |
| S.73/100      | RE50    | –             | –          | –                   | dark blue | semi-translucent | –                                       |
| S.73/101      | RE51    | 19.0          | 19         | –                   | dark      | semi-translucent | Spiral eyes                             |

**Table S2.** p-XRF data. Values represented as oxide weight % together with their respective standard deviations. <LOQ – below the limit of quantification, “-” – not applicable. Letters next to the name of samples mean the colour: b – blue; d – dark; g – green; lb – light blue; r – red; y – yellow; w – white.

| Group 1. Spherical blue beads |                  |      |                  |      |                                |      |      |       |      |                  |                                |                  |
|-------------------------------|------------------|------|------------------|------|--------------------------------|------|------|-------|------|------------------|--------------------------------|------------------|
|                               | K <sub>2</sub> O | CaO  | TiO <sub>2</sub> | MnO  | Fe <sub>2</sub> O <sub>3</sub> | CoO  | CuO  | ZnO   | SrO  | SnO <sub>2</sub> | Sb <sub>2</sub> O <sub>5</sub> | PbO <sub>2</sub> |
| RE3_b                         | <LOQ             | 7.3  | <LOQ             | <LOQ | 1.4                            | 0.10 | <LOQ | 0.07  | 0.04 | <LOQ             | <LOQ                           | <LOQ             |
| st.dev                        | -                | 2.0  | -                | -    | 0.3                            | 0.03 | -    | 0.03  | 0.03 | -                | -                              | -                |
| RE7_b                         | <LOQ             | 8.4  | <LOQ             | <LOQ | 1.3                            | 0.07 | <LOQ | 0.050 | 0.05 | <LOQ             | <LOQ                           | 0.3              |
| st.dev                        | -                | 0.8  | -                | -    | 0.2                            | 0.03 | -    | 0.006 | 0.02 | -                | -                              | 0.2              |
| RE8_b                         | <LOQ             | 6.1  | <LOQ             | <LOQ | 1.0                            | 0.09 | <LOQ | 0.04  | 0.04 | <LOQ             | <LOQ                           | <LOQ             |
| st.dev                        | -                | 1.1  | -                | -    | 0.2                            | 0.03 | -    | 0.02  | 0.02 | -                | -                              | -                |
| RE29_w                        | 2.6              | 4.6  | 0.49             | 0.10 | 3.8                            | 0.05 | <LOQ | 0.05  | 0.03 | <LOQ             | 0.6                            | 10.0             |
| st.dev                        | 0.7              | 1.1  | 0.08             | 0.03 | 0.8                            | 0.04 | -    | 0.05  | 0.02 | -                | 0.3                            | 3.4              |
| RE29_b                        | <LOQ             | 5.6  | <LOQ             | <LOQ | 1.1                            | 0.06 | <LOQ | 0.5   | 0.04 | 0.2              | <LOQ                           | 0.14             |
| st.dev                        | -                | 0.9  | -                | -    | 0.1                            | 0.03 | -    | 0.3   | 0.02 | 0.1              | -                              | 0.05             |
| RE32_b                        | <LOQ             | 7.0  | 0.26             | <LOQ | 1.7                            | 0.11 | <LOQ | 0.07  | 0.06 | <LOQ             | <LOQ                           | <LOQ             |
| st.dev                        | -                | 1.6  | 0.08             | -    | 0.2                            | 0.04 | -    | 0.02  | 0.03 | -                | -                              | -                |
| RE34_b                        | <LOQ             | 5.0  | <LOQ             | <LOQ | 1.2                            | 0.07 | <LOQ | 0.05  | 0.03 | <LOQ             | <LOQ                           | <LOQ             |
| st.dev                        | -                | 1.4  | -                | -    | 0.3                            | 0.03 | -    | 0.02  | 0.02 | -                | -                              | -                |
| RE38_b                        | <LOQ             | 5.4  | <LOQ             | <LOQ | 1.0                            | 0.06 | 0.7  | <LOQ  | 0.04 | <LOQ             | <LOQ                           | <LOQ             |
| st.dev                        | -                | 2.8  | -                | -    | 0.5                            | 0.03 | 0.5  | -     | 0.02 | -                | -                              | -                |
| RE38_w                        | 1.9              | 6.8  | 0.26             | <LOQ | 1.1                            | <LOQ | <LOQ | <LOQ  | 0.05 | <LOQ             | 1.2                            | <LOQ             |
| st.dev                        | 0.9              | 1.0  | 0.05             | -    | 0.5                            | -    | -    | -     | 0.02 | -                | 0.2                            | -                |
| RE41_b                        | <LOQ             | 6.6  | <LOQ             | <LOQ | 1.5                            | 0.07 | <LOQ | 0.047 | 0.04 | <LOQ             | <LOQ                           | <LOQ             |
| st.dev                        | -                | 1.0  | -                | -    | 0.2                            | 0.03 | -    | 0.006 | 0.02 | -                | -                              | -                |
| RE44_b                        | <LOQ             | 6.1  | <LOQ             | <LOQ | 1.2                            | 0.09 | <LOQ | 0.06  | 0.04 | <LOQ             | <LOQ                           | 0.15             |
| st.dev                        | -                | 1.8  | -                | -    | 0.1                            | 0.03 | -    | 0.02  | 0.01 | -                | -                              | 0.03             |
| RE45_b                        | 1.5              | 6.9  | 0.8              | <LOQ | 2.6                            | 0.13 | 0.5  | 0.11  | 0.04 | <LOQ             | 0.5                            | 9.4              |
| st.dev                        | 0.7              | 2.0  | 1.1              | -    | 0.9                            | 0.05 | 0.3  | 0.02  | 0.02 | -                | 0.2                            | 2.9              |
| Group 2. Pear shaped beads    |                  |      |                  |      |                                |      |      |       |      |                  |                                |                  |
|                               | K <sub>2</sub> O | CaO  | TiO <sub>2</sub> | MnO  | Fe <sub>2</sub> O <sub>3</sub> | CoO  | CuO  | ZnO   | SrO  | SnO <sub>2</sub> | Sb <sub>2</sub> O <sub>5</sub> | PbO <sub>2</sub> |
| RE30_b                        | <LOQ             | 5.8  | <LOQ             | <LOQ | 1.2                            | 0.08 | <LOQ | 0.05  | 0.04 | <LOQ             | <LOQ                           | <LOQ             |
| st.dev                        | -                | 1.3  | -                | -    | 0.3                            | 0.04 | -    | 0.01  | 0.02 | -                | -                              | -                |
| RE48_w                        | <LOQ             | 14.4 | 0.27             | <LOQ | 1.2                            | 0.04 | <LOQ | <LOQ  | 0.05 | <LOQ             | 1.0                            | 0.17             |
| st.dev                        | -                | 2.5  | 0.04             | -    | 0.2                            | 0.04 | -    | -     | 0.02 | -                | 0.5                            | 0.04             |
| RE48_b                        | <LOQ             | 8.2  | <LOQ             | <LOQ | 2.1                            | 0.13 | <LOQ | 0.05  | 0.06 | <LOQ             | 0.2                            | 0.27             |
| st.dev                        | -                | 2.1  | -                | -    | 0.6                            | 0.06 | -    | 0.02  | 0.03 | -                | 0.1                            | 0.09             |
| Group 3. Large ring beads     |                  |      |                  |      |                                |      |      |       |      |                  |                                |                  |
|                               | K <sub>2</sub> O | CaO  | TiO <sub>2</sub> | MnO  | Fe <sub>2</sub> O <sub>3</sub> | CoO  | CuO  | ZnO   | SrO  | SnO <sub>2</sub> | Sb <sub>2</sub> O <sub>5</sub> | PbO <sub>2</sub> |
| RE9_b                         | <LOQ             | 9.7  | <LOQ             | 4.0  | 1.9                            | 0.18 | 0.9  | 0.05  | 0.09 | <LOQ             | <LOQ                           | 0.4              |
| st.dev                        | -                | 2.1  | -                | 0.7  | 0.4                            | 0.07 | 0.5  | 0.03  | 0.04 | -                | -                              | 0.1              |
| RE9_y                         | <LOQ             | 8.2  | <LOQ             | 0.8  | 0.8                            | <LOQ | <LOQ | <LOQ  | 0.06 | 0.6              | <LOQ                           | 12.5             |
| st.dev                        | -                | 1.2  | -                | 0.3  | 0.2                            | -    | -    | -     | 0.02 | 0.3              | -                              | 4.4              |
| RE10_b                        | <LOQ             | 10.1 | <LOQ             | 0.21 | 0.6                            | <LOQ | <LOQ | <LOQ  | 0.07 | <LOQ             | 0.3                            | <LOQ             |
| st.dev                        | -                | 1.8  | -                | 0.04 | 0.1                            | -    | -    | -     | 0.02 | -                | 0.1                            | -                |
| RE16_b                        | <LOQ             | 7.4  | <LOQ             | 1.0  | 1.2                            | 0.09 | <LOQ | <LOQ  | 0.06 | <LOQ             | <LOQ                           | 0.18             |
| st.dev                        | -                | 1.1  | -                | 0.1  | 0.1                            | 0.03 | -    | -     | 0.02 | -                | -                              | 0.04             |
| RE18_b                        | 1.5              | 11.4 | <LOQ             | 1.81 | 1.38                           | 0.20 | <LOQ | <LOQ  | 0.08 | <LOQ             | <LOQ                           | 0.33             |
| st.dev                        | 0.5              | 1.4  | -                | 0.26 | 0.06                           | 0.03 | -    | -     | 0.02 | -                | -                              | 0.05             |



|        | K <sub>2</sub> O | CaO  | TiO <sub>2</sub> | MnO  | Fe <sub>2</sub> O <sub>3</sub> | CoO  | CuO  | ZnO  | SrO  | SnO <sub>2</sub> | Sb <sub>2</sub> O <sub>5</sub> | PbO <sub>2</sub> |
|--------|------------------|------|------------------|------|--------------------------------|------|------|------|------|------------------|--------------------------------|------------------|
| RE4_y  | <LOQ             | 9.2  | <LOQ             | 0.59 | 0.50                           | <LOQ | <LOQ | 0.08 | 0.07 | <LOQ             | 0.6                            | <LOQ             |
| st.dev | -                | 0.7  | -                | 0.08 | 0.04                           | -    | -    | 0.02 | 0.02 | -                | 0.1                            | -                |
| RE5_y  | <LOQ             | 8.4  | <LOQ             | 0.40 | 0.37                           | <LOQ | <LOQ | <LOQ | 0.06 | <LOQ             | 0.5                            | <LOQ             |
| st.dev | -                | 1.1  | -                | 0.05 | 0.04                           | -    | -    | -    | 0.02 | -                | 0.1                            | -                |
| RE6_y  | <LOQ             | 7.7  | <LOQ             | 0.37 | 0.33                           | <LOQ | <LOQ | <LOQ | 0.06 | <LOQ             | 0.5                            | <LOQ             |
| st.dev | -                | 1.9  | -                | 0.08 | 0.08                           | -    | -    | -    | 0.02 | -                | 0.2                            | -                |
| RE11_y | 1.7              | 10.9 | <LOQ             | 1.8  | 0.66                           | <LOQ | <LOQ | <LOQ | 0.10 | <LOQ             | <LOQ                           | 0.7              |
| st.dev | 0.5              | 1.4  | -                | 0.08 | 0.08                           | -    | -    | -    | 0.02 | -                | -                              | 1.0              |

**Group 8. Toroid beads**

|             | K <sub>2</sub> O | CaO  | TiO <sub>2</sub> | MnO  | Fe <sub>2</sub> O <sub>3</sub> | CoO  | CuO  | ZnO  | SrO  | SnO <sub>2</sub> | Sb <sub>2</sub> O <sub>5</sub> | PbO <sub>2</sub> |
|-------------|------------------|------|------------------|------|--------------------------------|------|------|------|------|------------------|--------------------------------|------------------|
| RE13_w      | 2.0              | 8.4  | <LOQ             | 0.31 | 0.8                            | <LOQ | <LOQ | <LOQ | 0.05 | 0.9              | 0.2                            | 1.7              |
| st.dev      | 0.9              | 2.6  | -                | 0.09 | 0.2                            | -    | -    | -    | 0.02 | 0.2              | 0.1                            | 0.2              |
| RE13_d      | 1.5              | 10.3 | <LOQ             | 1.2  | 1.15                           | 0.09 | <LOQ | <LOQ | 0.07 | <LOQ             | <LOQ                           | 0.38             |
| st.dev      | 0.5              | 1.1  | -                | 0.1  | 0.09                           | 0.03 | -    | -    | 0.02 | -                | -                              | 0.05             |
| RE14_w      | 1.5              | 8.7  | <LOQ             | 0.37 | 0.6                            | <LOQ | 0.6  | 0.07 | 0.05 | 0.9              | <LOQ                           | 6.1              |
| st.dev      | 0.4              | 1.1  | -                | 0.03 | 0.1                            | -    | 0.3  | 0.01 | 0.02 | 0.1              | -                              | 0.4              |
| RE14_d      | <LOQ             | 8.7  | <LOQ             | 2.2  | 0.55                           | 0.05 | <LOQ | <LOQ | 0.07 | 0.2              | <LOQ                           | 0.11             |
| st.dev      | -                | 1.0  | -                | 0.1  | 0.04                           | 0.03 | -    | -    | 0.02 | 0.1              | -                              | 0.07             |
| RE14_inside | <LOQ             | 7.8  | <LOQ             | 1.8  | 1.2                            | 0.07 | <LOQ | <LOQ | 0.07 | 0.4              | <LOQ                           | 7.8              |
| st.dev      | -                | 1.1  | -                | 0.2  | 0.2                            | 0.03 | -    | -    | 0.02 | 0.1              | -                              | 1.0              |
| RE15_w      | 1.5              | 8.2  | <LOQ             | 0.6  | 0.9                            | <LOQ | <LOQ | <LOQ | 0.04 | 1.5              | <LOQ                           | 2.3              |
| st.dev      | 0.5              | 2.5  | -                | 0.1  | 0.3                            | -    | -    | -    | 0.02 | 0.4              | -                              | 0.6              |
| RE15_d      | <LOQ             | 8.6  | <LOQ             | 2.34 | 0.5                            | <LOQ | <LOQ | <LOQ | 0.07 | 0.2              | <LOQ                           | 1.0              |
| st.dev      | -                | 0.7  | -                | 0.05 | 0.1                            | -    | -    | -    | 0.01 | 0.1              | -                              | 1.0              |
| RE15_y      | <LOQ             | 4.6  | <LOQ             | 0.4  | 0.7                            | <LOQ | <LOQ | <LOQ | 0.04 | 0.6              | <LOQ                           | 17.1             |
| st.dev      | -                | 1.8  | -                | 0.3  | 0.1                            | -    | -    | -    | 0.03 | 0.2              | -                              | 1.1              |
| RE17_w      | 2.3              | 7.8  | <LOQ             | 0.9  | 0.9                            | 0.05 | <LOQ | 0.05 | 0.07 | 0.4              | <LOQ                           | 1.5              |
| st.dev      | 0.7              | 1.8  | -                | 0.2  | 0.1                            | 0.03 | -    | 0.02 | 0.02 | 0.2              | -                              | 0.4              |
| RE17_d      | 1.7              | 8.7  | <LOQ             | 1.5  | 1.5                            | 0.11 | <LOQ | <LOQ | 0.07 | 0.2              | <LOQ                           | 1.1              |
| st.dev      | 0.6              | 1.6  | -                | 0.2  | 0.3                            | 0.04 | -    | -    | 0.02 | 0.1              | -                              | 0.5              |
| RE17_y      | <LOQ             | 4.2  | <LOQ             | 0.30 | 0.5                            | <LOQ | <LOQ | 0.05 | 0.03 | 0.5              | <LOQ                           | 16.7             |
| st.dev      | -                | 1.2  | -                | 0.07 | 0.1                            | -    | -    | 0.03 | 0.02 | 0.2              | -                              | 5.0              |

**Group 9. Bangles**

|            | K <sub>2</sub> O | CaO  | TiO <sub>2</sub> | MnO  | Fe <sub>2</sub> O <sub>3</sub> | CoO  | CuO  | ZnO   | SrO  | SnO <sub>2</sub> | Sb <sub>2</sub> O <sub>5</sub> | PbO <sub>2</sub> |
|------------|------------------|------|------------------|------|--------------------------------|------|------|-------|------|------------------|--------------------------------|------------------|
| RE19_w     | 2.5              | 9.2  | 0.33             | 0.3  | 2.2                            | 0.14 | <LOQ | <LOQ  | 0.06 | <LOQ             | 0.2                            | 0.11             |
| st.dev     | 0.8              | 1.8  | 0.07             | 0.1  | 0.3                            | 0.09 | -    | -     | 0.02 | -                | 0.2                            | 0.05             |
| RE19_y     | 1.5              | 6.1  | <LOQ             | 0.09 | 1.55                           | 0.17 | <LOQ | 0.06  | 0.05 | <LOQ             | 0.2                            | 3.6              |
| st.dev     | 0.5              | 1.0  | -                | 0.03 | 0.16                           | 0.06 | -    | 0.02  | 0.02 | -                | 0.1                            | 0.5              |
| RE19_b     | 1.5              | 7.5  | <LOQ             | 0.09 | 1.17                           | 0.25 | 0.5  | <LOQ  | 0.05 | <LOQ             | <LOQ                           | 0.3              |
| st.dev     | 0.5              | 1.0  | -                | 0.03 | 0.05                           | 0.04 | 0.3  | -     | 0.02 | -                | -                              | 0.2              |
| RE20_w     | 1.5              | 13.9 | 0.38             | 0.21 | 0.9                            | <LOQ | <LOQ | 0.052 | 0.07 | <LOQ             | 3.2                            | <LOQ             |
| st.dev     | 0.5              | 1.7  | 0.02             | 0.04 | 0.1                            | -    | -    | 0.006 | 0.02 | -                | 0.6                            | -                |
| RE20_brown | <LOQ             | 8.1  | <LOQ             | <LOQ | 0.55                           | <LOQ | <LOQ | <LOQ  | 0.06 | <LOQ             | <LOQ                           | <LOQ             |
| st.dev     | -                | 2.2  | -                | -    | 0.09                           | -    | -    | -     | 0.02 | -                | -                              | -                |
| RE22_w     | 1.9              | 6.9  | <LOQ             | 0.18 | 1.6                            | 0.14 | <LOQ | 0.05  | 0.05 | <LOQ             | <LOQ                           | <LOQ             |
| st.dev     | 0.4              | 1.6  | -                | 0.02 | 0.2                            | 0.05 | -    | 0.01  | 0.02 | -                | -                              | -                |
| RE22_b     | <LOQ             | 7.1  | <LOQ             | 0.10 | 1.1                            | 0.23 | <LOQ | <LOQ  | 0.05 | <LOQ             | <LOQ                           | <LOQ             |
| st.dev     | -                | 0.9  | -                | 0.03 | 0.2                            | 0.05 | -    | -     | 0.01 | -                | -                              | -                |
| RE23_y     | <LOQ             | 6.8  | <LOQ             | 0.08 | 1.6                            | 0.18 | <LOQ | 0.05  | 0.05 | <LOQ             | 0.2                            | 4.0              |
| st.dev     | -                | 1.0  | -                | 0.02 | 0.2                            | 0.03 | -    | 0.01  | 0.02 | -                | 0.1                            | 0.5              |

|                      |                       |            |                        |            |                                    |            |            |            |            |                        |                                    |                        |
|----------------------|-----------------------|------------|------------------------|------------|------------------------------------|------------|------------|------------|------------|------------------------|------------------------------------|------------------------|
| RE23_b               | <LOQ                  | 6.9        | <LOQ                   | 0.08       | 1.1                                | 0.23       | <LOQ       | <LOQ       | 0.05       | <LOQ                   | <LOQ                               | 0.7                    |
| st.dev               | -                     | 1.2        | -                      | 0.03       | 0.1                                | 0.05       | -          | -          | 0.02       | -                      | -                                  | 0.4                    |
| RE24_b               | 4.6                   | 7.6        | <LOQ                   | 0.17       | 0.96                               | 0.11       | <LOQ       | 0.06       | 0.05       | <LOQ                   | <LOQ                               | <LOQ                   |
| st.dev               | 1.3                   | 0.9        | -                      | 0.03       | 0.08                               | 0.03       | -          | 0.01       | 0.01       | -                      | -                                  | -                      |
| RE26_y               | <LOQ                  | 3.1        | <LOQ                   | <LOQ       | 1.3                                | <LOQ       | <LOQ       | 0.06       | 0.02       | <LOQ                   | 0.4                                | 3.9                    |
| st.dev               | -                     | 1.0        | -                      | -          | 0.3                                | -          | -          | 0.02       | 0.01       | -                      | 0.1                                | 0.7                    |
| RE26_b               | <LOQ                  | 9.7        | <LOQ                   | <LOQ       | 1.7                                | 0.08       | <LOQ       | <LOQ       | 0.04       | <LOQ                   | <LOQ                               | <LOQ                   |
| st.dev               | -                     | 1.5        | -                      | -          | 0.4                                | 0.03       | -          | -          | 0.02       | -                      | -                                  | -                      |
| <b>Other objects</b> |                       |            |                        |            |                                    |            |            |            |            |                        |                                    |                        |
|                      | <b>K<sub>2</sub>O</b> | <b>CaO</b> | <b>TiO<sub>2</sub></b> | <b>MnO</b> | <b>Fe<sub>2</sub>O<sub>3</sub></b> | <b>CoO</b> | <b>CuO</b> | <b>ZnO</b> | <b>SrO</b> | <b>SnO<sub>2</sub></b> | <b>Sb<sub>2</sub>O<sub>5</sub></b> | <b>PbO<sub>2</sub></b> |
| RE2_b                | <LOQ                  | 7.1        | <LOQ                   | <LOQ       | 0.9                                | 0.04       | 1.1        | 0.04       | 0.05       | <LOQ                   | <LOQ                               | <LOQ                   |
| st.dev               | -                     | 3.4        | -                      | -          | 0.5                                | 0.03       | 0.6        | 0.02       | 0.02       | -                      | -                                  | -                      |
| RE25_b               | 1.8                   | 6.5        | <LOQ                   | 0.47       | 0.96                               | 0.10       | <LOQ       | <LOQ       | 0.05       | <LOQ                   | 0.2                                | <LOQ                   |
| st.dev               | 0.5                   | 0.8        | -                      | 0.03       | 0.08                               | 0.03       | -          | -          | 0.02       | -                      | 0.1                                | -                      |
| RE28_grey            | 2.0                   | 6.3        | <LOQ                   | 0.6        | 1.5                                | <LOQ       | <LOQ       | <LOQ       | 0.05       | 1.1                    | 0.4                                | 6.9                    |
| st.dev               | 0.7                   | 1.5        | -                      | 0.1        | 0.2                                | -          | -          | -          | 0.02       | 0.5                    | 0.2                                | 2.2                    |
| RE28_r               | <LOQ                  | 2.8        | <LOQ                   | 0.33       | 1.7                                | <LOQ       | 0.6        | <LOQ       | 0.04       | 0.3                    | 0.4                                | 3.2                    |
| st.dev               | -                     | 1.1        | -                      | 0.03       | 0.4                                | -          | 0.4        | -          | 0.02       | 0.1                    | 0.2                                | 1.0                    |
| RE36_d               | <LOQ                  | 6.3        | 0.3                    | 4.5        | 1.4                                | <LOQ       | <LOQ       | 0.04       | 0.07       | <LOQ                   | <LOQ                               | <LOQ                   |
| st.dev               | -                     | 1.0        | 0.3                    | 0.5        | 0.2                                | -          | -          | 0.03       | 0.02       | -                      | -                                  | -                      |
| RE43_b               | 3.1                   | 10.2       | <LOQ                   | 0.73       | 1.3                                | 0.24       | <LOQ       | <LOQ       | 0.06       | <LOQ                   | <LOQ                               | <LOQ                   |
| st.dev               | 0.6                   | 1.2        | -                      | 0.07       | 0.1                                | 0.04       | -          | -          | 0.02       | -                      | -                                  | -                      |
| RE49_y               | <LOQ                  | 7.6        | <LOQ                   | <LOQ       | 1.8                                | 0.04       | <LOQ       | <LOQ       | 0.05       | <LOQ                   | 0.6                                | 9.4                    |
| st.dev               | -                     | 1.0        | -                      | -          | 0.2                                | 0.04       | -          | -          | 0.02       | -                      | 0.1                                | 0.5                    |
| RE49_b               | <LOQ                  | 7.7        | <LOQ                   | <LOQ       | 2.4                                | 0.11       | 0.6        | 0.039      | 0.05       | <LOQ                   | <LOQ                               | 0.22                   |
| st.dev               | -                     | 2.2        | -                      | -          | 0.5                                | 0.03       | 0.3        | 0.004      | 0.01       | -                      | -                                  | 0.03                   |
| RE49_l_b             | <LOQ                  | 10.0       | <LOQ                   | <LOQ       | 0.65                               | <LOQ       | 2.6        | <LOQ       | 0.05       | <LOQ                   | 2.4                                | 0.26                   |
| st.dev               | -                     | 1.4        | -                      | -          | 0.08                               | -          | 0.5        | -          | 0.02       | -                      | 0.1                                | 0.06                   |
| RE50_d               | <LOQ                  | 9.3        | <LOQ                   | 0.09       | 0.7                                | <LOQ       | <LOQ       | <LOQ       | 0.06       | <LOQ                   | 0.3                                | 0.3                    |
| st.dev               | -                     | 1.3        | -                      | 0.05       | 0.2                                | -          | -          | -          | 0.01       | -                      | 0.1                                | 0.3                    |
| RE50_w               | 1.9                   | 9.94       | 0.28                   | 0.6        | 1.6                                | <LOQ       | <LOQ       | 0.039      | 0.08       | <LOQ                   | 3.7                                | 2.6                    |
| st.dev               | 0.8                   | 2.87       | 0.08                   | 0.3        | 0.6                                | -          | -          | 0.009      | 0.03       | -                      | 2.2                                | 1.8                    |
| RE50_b               | <LOQ                  | 5.1        | <LOQ                   | 0.1        | 0.7                                | 0.05       | <LOQ       | <LOQ       | 0.04       | <LOQ                   | 1.1                                | 0.2                    |
| st.dev               | -                     | 4.0        | -                      | 0.1        | 0.5                                | 0.05       | -          | -          | 0.03       | -                      | 1.2                                | 0.2                    |
| RE51_w               | 2.5                   | 8.5        | <LOQ                   | 0.1        | 0.7                                | <LOQ       | <LOQ       | 0.07       | 0.03       | 1.3                    | <LOQ                               | 12.2                   |
| st.dev               | 1.3                   | 3.1        | -                      | 0.1        | 0.3                                | -          | -          | 0.04       | 0.03       | 0.5                    | -                                  | 5.0                    |
| RE51_d               | 7.6                   | 9.1        | 0.29                   | 1.2        | 1.4                                | <LOQ       | <LOQ       | 0.05       | 0.05       | <LOQ                   | <LOQ                               | 0.2                    |
| st.dev               | 1.5                   | 1.6        | 0.05                   | 0.1        | 0.2                                | -          | -          | 0.01       | 0.02       | -                      | -                                  | 0.1                    |
